# Supplementary material for: Determination of major and trace element variability in healthy human urine by ICP-QMS and specific gravity normalisation
Source: PubMed Central journal article supplement (PMC9089848; doi:10.1039/c8ra06794e), 2018-11-13
Supplement: RA-008-C8RA06794E-s001.pdf [file RA-008-C8RA06794E-s001.pdf]

**Supplementary Information (Part I) to:**

**Determination of major and trace element variability in healthy human urine by  
ICP-QMS and specific gravity normalisation**

**Moore RET · Rehkämper M · Kreissig K · Strekopytov S · Lerner F**

R. E. T. Moore (✉) · M. Rehkämper · K. Kreissig

Department of Earth Science and Engineering

Imperial College London

London SW7 2AZ

UK

Email: r.moore13@imperial.ac.uk

Tel: 07974 779 418

S. Strekopytov

Imaging and Analysis Centre

Natural History Museum

London SW7 5BD

UK

F. Lerner

Department of Earth Sciences

University of Oxford

Oxford OX1 3AN

UK

**Table S1:** Sources of major and trace elements measured in this study in commonly eaten food and drink.

| Element | Food source                                                                                                                   | Ref(s). |
|---------|-------------------------------------------------------------------------------------------------------------------------------|---------|
| Na      | Table salt, cured meat and fish, egg                                                                                          | 1, 2    |
| Mg      | Seeds, cereals, nuts, spinach, chocolate, meat, dairy products                                                                | 1, 2, 3 |
| K       | Nuts, dried fruit, root vegetables, tomato, pepper, leek, pulses, avocado, banana, chocolate, orange juice, milk, tea, coffee | 1, 2, 3 |
| Ca      | Milk, yogurt, cheese, fish (e.g. salmon, sardines), tofu, vegetables (e.g. broccoli, turnip)                                  | 1, 2    |
| Co      | Meat, fish, shellfish, leafy vegetables, legumes, nuts, seeds                                                                 | 2, 3    |
| Cu      | Liver, cocoa powder, nuts, legumes, shellfish                                                                                 | 2,3, 4  |
| Zn      | Meat, fish, shellfish, legumes, nuts, seeds, bread                                                                            | 1, 2, 3 |
| As      | Seafood, water, cereals                                                                                                       | 2, 5, 6 |
| Rb      | Asparagus, lettuce, carrot, black tea, coffee, cocoa                                                                          | 7       |
| Sr      | Seafood, gram, nuts, kale, tea                                                                                                | 8       |
| Mo      | Legumes, leafy vegetables, liver, cereals, nuts, milk                                                                         | 2, 4    |
| Pb      | Water, milk, spinach, chocolate, cereal                                                                                       | 9, 10   |

**Table S2:** Operational conditions of ICP-QMS

|                                    | 'No gas' mode                                                                                                                                                                               | He mode                                                                                                                                                                                                                                                                                    | H <sub>2</sub> mode                                                   |
|------------------------------------|---------------------------------------------------------------------------------------------------------------------------------------------------------------------------------------------|--------------------------------------------------------------------------------------------------------------------------------------------------------------------------------------------------------------------------------------------------------------------------------------------|-----------------------------------------------------------------------|
| RF power                           |                                                                                                                                                                                             | 1550 W                                                                                                                                                                                                                                                                                     |                                                                       |
| Plasma gas flow                    |                                                                                                                                                                                             | 15 l/min                                                                                                                                                                                                                                                                                   |                                                                       |
| Carrier gas flow                   |                                                                                                                                                                                             | 1.03–1.07 l/min                                                                                                                                                                                                                                                                            |                                                                       |
| Dilution gas flow                  |                                                                                                                                                                                             | 0.00 l/min                                                                                                                                                                                                                                                                                 |                                                                       |
| CRC gas flow                       | –                                                                                                                                                                                           | 5 ml/min<br>(He 99.9995%)                                                                                                                                                                                                                                                                  | 6 ml/min<br>(H <sub>2</sub> 99.9999%)                                 |
| Octopole bias                      | –8.0 V                                                                                                                                                                                      | –18.0 V                                                                                                                                                                                                                                                                                    | –18.0 V                                                               |
| Cell entrance                      | –30 V                                                                                                                                                                                       | –40 V                                                                                                                                                                                                                                                                                      | –40 V                                                                 |
| Cell exit                          | –50 V                                                                                                                                                                                       | –60 V                                                                                                                                                                                                                                                                                      | –60 V                                                                 |
| Deflect                            | 13.2 V                                                                                                                                                                                      | 1.4 V                                                                                                                                                                                                                                                                                      | –0.4 V                                                                |
| Plate bias                         | –40 V                                                                                                                                                                                       | –60 V                                                                                                                                                                                                                                                                                      | –60 V                                                                 |
| Nebuliser type                     |                                                                                                                                                                                             | Micromist                                                                                                                                                                                                                                                                                  |                                                                       |
| <i>Data acquisition parameters</i> |                                                                                                                                                                                             |                                                                                                                                                                                                                                                                                            |                                                                       |
| m/z isotopes measured              | <sup>59</sup> Co, <sup>65</sup> Cu, <sup>66</sup> Zn, <sup>75</sup> As,<br><sup>85</sup> Rb, <sup>88</sup> Sr, <sup>95</sup> Mo, <sup>206</sup> Pb,<br><sup>207</sup> Pb, <sup>208</sup> Pb | <sup>23</sup> Na, <sup>24</sup> Mg, <sup>39</sup> K, <sup>44</sup> Ca,<br><sup>59</sup> Co, <sup>63</sup> Cu, <sup>65</sup> Cu,<br><sup>66</sup> Zn, <sup>75</sup> As, <sup>85</sup> Rb, <sup>88</sup> Sr,<br><sup>95</sup> Mo, <sup>206</sup> Pb, <sup>207</sup> Pb,<br><sup>208</sup> Pb | <sup>23</sup> Na, <sup>24</sup> Mg, <sup>39</sup> K, <sup>40</sup> Ca |
| m/z internal standards             | <sup>103</sup> Rh, <sup>115</sup> In                                                                                                                                                        | <sup>103</sup> Rh, <sup>115</sup> In                                                                                                                                                                                                                                                       | <sup>103</sup> Rh, <sup>115</sup> In                                  |

**Table S3:** Major and trace element concentrations determined for Trace Elements Urine L-1

| Element          | Trace Elements Urine L-1, LOT 1403080               |                     |             |                          |
|------------------|-----------------------------------------------------|---------------------|-------------|--------------------------|
|                  | LOQ <sup>a</sup><br>H <sub>2</sub> mode<br>/He mode | H <sub>2</sub> mode | He mode     | Reference <sup>b</sup>   |
|                  | µg/ml                                               | µg/ml               | µg/ml       | µg/ml                    |
| <sup>23</sup> Na | 0.1 / 0.1                                           | 2803 ± 81           | 2670 ± 137  | 2780 <sup>c, d</sup>     |
| <sup>24</sup> Mg | 0.01 / 0.01                                         | 76.6 ± 4.2          | 79 ± 4      | 77.6 ± 17.4 <sup>d</sup> |
| <sup>39</sup> K  | 0.1 / 0.3                                           | 1980 ± 92           | 1979 ± 195  | 1901 <sup>c, d</sup>     |
| <sup>40</sup> Ca | 0.008 / -                                           | 109 ± 4             |             | 107 <sup>c, d</sup>      |
| <sup>44</sup> Ca | - / 0.16                                            |                     | 114 ± 8     | 107 <sup>c, d</sup>      |
|                  | 'No gas'<br>/He mode                                | 'No gas' mode       | He mode     | Reference <sup>b</sup>   |
|                  | ng/ml                                               | ng/ml               | ng/ml       | ng/ml                    |
| <sup>59</sup> Co | 0.16 / 0.08                                         | 0.90 ± 0.17         | 0.78 ± 0.15 | 0.80 ± 0.16              |
| <sup>63</sup> Cu | - / 0.7                                             |                     | 19.9 ± 3.5  | 20 ± 4                   |
| <sup>65</sup> Cu | 0.7 / -                                             | 21.7 ± 4.0          |             | 20 ± 4                   |
| <sup>66</sup> Zn | 0.3 / 0.15                                          | 365 ± 78            | 379 ± 79    | 347 ± 70                 |
| <sup>75</sup> As | - / 0.5                                             |                     | 151 ± 23    | 158 ± 32                 |
| <sup>85</sup> Rb | 0.6 / 0.6                                           | 1117 ± 136          | 1193 ± 163  | 1150 <sup>c</sup>        |
| <sup>88</sup> Sr | 0.1 / 0.1                                           | 103 ± 13            | 104 ± 11    | 119 <sup>c</sup>         |
| <sup>95</sup> Mo | 0.25 / 0.25                                         | 42.6 ± 2.7          | 40.3 ± 2.8  | 47.1 ± 9.5               |
| Pb <sup>e</sup>  | 0.1 / 0.03                                          | 0.75 ± 0.18         | 0.71 ± 0.19 | 0.72 ± 0.36              |

The uncertainties of sample concentrations denote 1SD (standard deviation; n=2 for Na, Mg, K and Ca and n=5 for all other elements).

<sup>a</sup> LOQ = Limit of quantification (for He mode and H<sub>2</sub> mode or 'no gas' mode and He mode respectively).

<sup>b</sup> Reference data obtained using sector field (SF) ICP-MS and have expanded uncertainties with coverage factor k=2 at the 95 % confidence interval).<sup>11</sup>

<sup>c</sup> Additional approximate values, not certified

<sup>d</sup> Average of values determined by SF-ICP-MS and inductively coupled plasma optical emission spectroscopy (ICP-OES).

<sup>e</sup> Pb concentrations are calculated based on the average intensity of three lead isotopes: <sup>206</sup>Pb, <sup>207</sup>Pb and <sup>208</sup>Pb.

**Table S4:** Major and trace element concentrations determined for bovine muscle ERM-BB184 and Human blood serum BCR-639.

| Isotope            | Bovine muscle ERM-BB184 |                          |                 | Human blood serum BCR-639  |                  |                         |                  |                        |
|--------------------|-------------------------|--------------------------|-----------------|----------------------------|------------------|-------------------------|------------------|------------------------|
|                    | LOQ <sup>a</sup>        | This study n=            |                 | LOQ <sup>a</sup>           | This study, n=2  |                         |                  | Reference <sup>b</sup> |
|                    | 'No gas'<br>/He mode    | 'No gas'                 | He mode         | 'No gas'<br>/He mode       | 'No gas'         | He mode                 |                  | Reference <sup>b</sup> |
|                    | $\mu\text{g/g}$         | $\mu\text{g/g}$          | $\mu\text{g/g}$ | $\mu\text{g/ml}$           | $\mu\text{g/ml}$ | $\mu\text{g/ml}$        | $\mu\text{g/ml}$ | $\mu\text{g/ml}$       |
| <sup>23</sup> Na   | - / 15                  |                          | 1861            | 1804 <sup>c</sup>          | - / 4            |                         | 3454 ± 136       |                        |
| <sup>24</sup> Mg   | - / 8                   |                          | 1060            | 997 <sup>c</sup>           | - / 0.25         |                         | 22.3 ± 0.3       |                        |
| <sup>39</sup> K    | - / 250                 |                          | 15774           | 15844 <sup>c</sup>         | - / 7.2          |                         | 176 ± 37         |                        |
| <sup>44</sup> Ca   | - / 85                  |                          | 257             | 155 <sup>c</sup>           | - / 2.4          |                         | 119 ± 15         |                        |
|                    | $\mu\text{g/g}$         | $\mu\text{g/g}$          | $\mu\text{g/g}$ | $\mu\text{g/g}$            | ng/ml            | ng/ml                   | ng/ml            | ng/ml                  |
| <sup>59</sup> Co   | 0.006 / 0.007           | 0.012                    | 0.012           |                            | 0.8 / 0.8        | 1.20 ± 0.18             | 0.99 ± 0.06      |                        |
| <sup>63</sup> Cu   | - / 0.08                |                          | 2.29            | 2.31 ± 0.09                | - / 12           |                         | 1056 ± 10        |                        |
| <sup>65</sup> Cu   | 0.08 / 0.08             | 2.35                     | 2.35            | 2.31 ± 0.09                | 12 / 12          | 1090 ± 16               | 1077 ± 12        |                        |
| <sup>66</sup> Zn   | 0.18 / 0.12             | 153                      | 158             | 146 ± 7                    | 26 / 17          | 2750 ± 3                | 3676 ± 25        | 2360 ± 140             |
| ID Zn <sup>d</sup> |                         | 151.5 ± 0.4 <sup>e</sup> |                 | 146 ± 7                    |                  | 2410 ± 100 <sup>e</sup> |                  | 2360 ± 140             |
| <sup>75</sup> As   | - / 0.04                |                          | <0.04           | 0.020 ± 0.003              | - / 6            |                         | <6               |                        |
| <sup>85</sup> Rb   | 0.04 / 0.04             | 7.49                     | 7.72            |                            | 6 / 6            | 157 ± 9                 | 169 ± 14         |                        |
| <sup>88</sup> Sr   | 0.008 / 0.008           | 0.109                    | 0.12            |                            | 1.2 / 1.2        | 45.2 ± 0.1              | 45.4 ± 1.6       |                        |
| <sup>95</sup> Mo   | - / 0.05                |                          | <0.05           |                            | - / 15           |                         | <15              |                        |
| Pb <sup>f</sup>    | 0.003 / 0.003           | 0.011                    | 0.01            | 0.0014-0.0158 <sup>g</sup> | 0.4 / 0.4        | 2.77 ± 0.44             | 2.22 ± 0.24      |                        |

The uncertainties of sample concentrations (where shown) denote 1SD (standard deviation):

<sup>a</sup> LOQ = Limit of quantification

<sup>b</sup> Reference data have expanded uncertainties with coverage factor k=2 at the 95 % confidence interval<sup>12,13</sup>

<sup>c</sup> Additional values, not certified

<sup>d</sup> Determined by ID-MC-ICP-MS

<sup>e</sup> Values from Moore et al. 2017<sup>14</sup>

<sup>f</sup> Lead concentrations are calculated based on the average intensity of three lead isotopes: <sup>206</sup>Pb, <sup>207</sup>Pb and <sup>208</sup>Pb.

<sup>g</sup> Not certified; Lead concentrations are likely to be non-homogenous in the sample

**Table S5:** Matrices of the correlation coefficients  $r$  and  $r^2$  determined from the results of the 65 individual samples

| $r$ | Na    | Mg    | K     | Ca    | Co    | Cu    | Zn    | As    | Rb   | Sr    | Mo   |
|-----|-------|-------|-------|-------|-------|-------|-------|-------|------|-------|------|
| Na  | -     |       |       |       |       |       |       |       |      |       |      |
| Mg  | 0.06  | -     |       |       |       |       |       |       |      |       |      |
| K   | 0.48  | 0.11  | -     |       |       |       |       |       |      |       |      |
| Ca  | 0.09  | 0.29  | 0.00  | -     |       |       |       |       |      |       |      |
| Co  | 0.02  | 0.37  | 0.14  | -0.45 | -     |       |       |       |      |       |      |
| Cu  | 0.12  | 0.20  | -0.02 | -0.15 | 0.12  | -     |       |       |      |       |      |
| Zn  | -0.32 | -0.06 | -0.38 | 0.24  | -0.40 | 0.42  | -     |       |      |       |      |
| As  | -0.22 | 0.04  | -0.11 | 0.25  | -0.09 | -0.23 | 0.04  | -     |      |       |      |
| Rb  | 0.37  | 0.13  | 0.90  | -0.13 | 0.21  | 0.01  | -0.33 | -0.16 | -    |       |      |
| Sr  | 0.24  | 0.39  | 0.12  | 0.81  | -0.23 | 0.04  | 0.23  | 0.01  | 0.04 | -     |      |
| Mo  | 0.28  | 0.19  | 0.09  | -0.08 | 0.18  | 0.38  | -0.25 | -0.02 | 0.02 | -0.04 | -    |
| Pb  | 0.36  | 0.30  | 0.15  | 0.23  | 0.20  | 0.14  | 0.08  | 0.17  | 0.13 | 0.47  | 0.12 |

| $r^2$ | Na   | Mg   | K    | Ca   | Co   | Cu   | Zn   | As   | Rb   | Sr   | Mo   |
|-------|------|------|------|------|------|------|------|------|------|------|------|
| Na    | -    |      |      |      |      |      |      |      |      |      |      |
| Mg    | 0.00 | -    |      |      |      |      |      |      |      |      |      |
| K     | 0.23 | 0.01 | -    |      |      |      |      |      |      |      |      |
| Ca    | 0.01 | 0.08 | 0.00 | -    |      |      |      |      |      |      |      |
| Co    | 0.00 | 0.13 | 0.02 | 0.20 | -    |      |      |      |      |      |      |
| Cu    | 0.01 | 0.04 | 0.00 | 0.02 | 0.01 | -    |      |      |      |      |      |
| Zn    | 0.10 | 0.00 | 0.15 | 0.06 | 0.16 | 0.18 | -    |      |      |      |      |
| As    | 0.05 | 0.00 | 0.01 | 0.06 | 0.01 | 0.05 | 0.00 | -    |      |      |      |
| Rb    | 0.14 | 0.02 | 0.81 | 0.02 | 0.04 | 0.00 | 0.11 | 0.03 | -    |      |      |
| Sr    | 0.06 | 0.15 | 0.01 | 0.66 | 0.05 | 0.00 | 0.05 | 0.00 | 0.00 | -    |      |
| Mo    | 0.08 | 0.04 | 0.01 | 0.01 | 0.03 | 0.14 | 0.06 | 0.00 | 0.00 | 0.00 | -    |
| Pb    | 0.13 | 0.09 | 0.02 | 0.05 | 0.04 | 0.02 | 0.01 | 0.03 | 0.02 | 0.22 | 0.01 |

White: low  $r$  and  $r^2$ , green:  $0.4 < r < 0.5$ ,  $0.2 < r^2 < 0.8$ , red:  $r > 0.8$ ,  $r^2 > 0.65$ .

**Table S6:** Daily mean urinary element concentrations of the study participants P1 to P10.

| <b>Participant<br/>(n - d)</b> | <b>Na</b><br>µg/ml | <b>Mg</b><br>µg/ml | <b>K</b><br>µg/ml | <b>Ca</b><br>µg/ml | <b>Co</b><br>ng/ml | <b>Cu</b><br>ng/ml | <b>Zn</b><br>ng/ml | <b>As</b><br>ng/ml | <b>Rb</b><br>ng/ml | <b>Sr</b><br>ng/ml | <b>Mo</b><br>ng/ml | <b>Pb</b><br>ng/ml |
|--------------------------------|--------------------|--------------------|-------------------|--------------------|--------------------|--------------------|--------------------|--------------------|--------------------|--------------------|--------------------|--------------------|
| P1 (8 - 2)                     | 3351               | 98.5               | 3655              | 220                | 0.20               | 9.22               | 530                | 82.5               | 2143               | 177                | 27.3               | 0.73               |
| P2 (6 - 2)                     | 5535               | 112                | 5132              | 139                | 0.42               | 10.1               | 202                | 42.8               | 2052               | 183                | 64.8               | 0.97               |
| P3 (5 - 1)                     | 1466               | 117                | 3519              | 213                | 0.41               | 10.1               | 318                | 187                | 1352               | 159                | 41.8               | 0.74               |
| P4 (9 - 2)                     | 3320               | 114                | 4654              | 158                | 0.54               | 12.5               | 220                | 75.6               | 1950               | 124                | 92.4               | 0.46               |
| P5 (4 - 1)                     | 5318               | 161                | 6489              | 132                | 1.83               | 12.6               | 96.4               | 3.52               | 2821               | 229                | 95.1               | 0.96               |
| P6 (8 - 2)                     | 2395               | 110                | 4167              | 16.9               | 1.56               | 10.4               | 134                | 22.0               | 2203               | 58.4               | 31.6               | 0.61               |
| P7 (9 - 2)                     | 3265               | 98.5               | 3222              | 217                | 0.14               | 8.89               | 300                | 5.68               | 1722               | 231                | 32.7               | 0.60               |
| P8 (4 - 1)                     | 5958               | 60.5               | 2499              | 104                | 0.25               | 14.6               | 468                | 3.73               | 1446               | 109                | 66.4               | 0.66               |
| P9 (7 - 2)                     | 2028               | 62.7               | 2235              | 117                | 0.17               | 14.7               | 683                | 9.41               | 1244               | 143                | 41.3               | 0.54               |
| P10 (5 - 1)                    | 4144               | 134                | 5989              | 181                | 0.21               | 13.7               | 414                | 7.46               | 2255               | 239                | 64.3               | 0.76               |
| Mean                           | 3678               | 107                | 4156              | 150                | 0.57               | 11.7               | 336                | 43.9               | 1919               | 165                | 55.8               | 0.70               |
| Median                         | 3335               | 111                | 3911              | 148                | 0.33               | 11.4               | 309                | 15.7               | 2001               | 168                | 53.1               | 0.69               |
| SD                             | 1457               | 29                 | 1340              | 60                 | 0.58               | 2.1                | 177                | 55.3               | 460                | 56                 | 23.4               | 0.16               |
| CV (%)                         | 40                 | 27                 | 32                | 40                 | 101                | 18                 | 53                 | 126                | 24                 | 34                 | 42                 | 23                 |

Participants: n = number of samples; d = length of sampling period in days.

Deviation from the median value for all participants by a factor of:

1-0.75 and 1-1.25 (white)

0.76-0.50 and 1.26-1.50 (green)

0.49-0.25 and 1.51-2.00 (yellow)

<0.25 and >2 (red)

**Table S7a:** Coefficients of variation (CV values in %) for element concentrations of urine samples collected on a single day for the study participants P1 to P10.

| CV values (%) | Na | Mg  | K  | Ca | Co | Cu | Zn | As  | Rb | Sr | Mo | Pb |
|---------------|----|-----|----|----|----|----|----|-----|----|----|----|----|
| P1 - Day 1    | 21 | 11  | 34 | 21 | 20 | 18 | 22 | 19  | 31 | 14 | 39 | 12 |
| P1 - Day 2    | 53 | 37  | 75 | 58 | 27 | 12 | 31 | 55  | 76 | 40 | 21 | 15 |
| P2 - Day 1    | 6  | 7   | 41 | 32 | 21 | 15 | 47 | 11  | 25 | 29 | 56 | 9  |
| P2 - Day 2    | 15 | 61  | 33 | 15 | 40 | 25 | 91 | 21  | 28 | 14 | 43 | 17 |
| P3            | 14 | 22  | 79 | 39 | 49 | 38 | 40 | 102 | 54 | 26 | 34 | 33 |
| P4 - Day 1    | 55 | 114 | 59 | 19 | 45 | 19 | 27 | 19  | 22 | 16 | 6  | 19 |
| P4 - Day 2    | 36 | 50  | 68 | 64 | 31 | 19 | 48 | 16  | 52 | 48 | 39 | 26 |
| P5            | 46 | 78  | 69 | 81 | 15 | 38 | 27 | 115 | 63 | 65 | 19 | 26 |
| P6 - Day 1    | 20 | 47  | 58 | 71 | 30 | 6  | 43 | 26  | 46 | 59 | 15 | 7  |
| P6 - Day 2    | 18 | 24  | 44 | 31 | 38 | 21 | 49 | 19  | 35 | 26 | 41 | 18 |
| P7 - Day 1    | 22 | 26  | 49 | 20 | 25 | 15 | 48 | 18  | 30 | 9  | 51 | 8  |
| P7 - Day 2    | 23 | 24  | 61 | 19 | 41 | 8  | 26 | 58  | 47 | 17 | 30 | 18 |
| P8            | 31 | 14  | 17 | 10 | 50 | 9  | 37 | 4   | 14 | 8  | 32 | 23 |
| P9 - Day 1    | 40 | 31  | 14 | 71 | 18 | 19 | 57 | 25  | 27 | 55 | 26 | 50 |
| P9 - Day 2    | 57 | 42  | 31 | 38 | 5  | 14 | 31 | 30  | 17 | 28 | 23 | 19 |
| P10           | 9  | 16  | 30 | 22 | 22 | 12 | 27 | 24  | 30 | 18 | 43 | 16 |
| 1-Day Mean    | 29 | 38  | 48 | 38 | 30 | 18 | 41 | 35  | 37 | 29 | 32 | 20 |

CV values marked green are >25% and ≤50%; yellow CVs are >50% and ≤100%; red CVs are >100%.

**Table S7b:** Coefficients of variation (CV values in %) for element concentrations of urine samples collected on two non-consecutive days for six study participants.

| CV values (%) | Na  | Mg  | K   | Ca  | Co  | Cu  | Zn  | As  | Rb  | Sr  | Mo  | Pb  |
|---------------|-----|-----|-----|-----|-----|-----|-----|-----|-----|-----|-----|-----|
| P1 - Days 1+2 | 39  | 27  | 54  | 45  | 29  | 16  | 29  | 115 | 52  | 33  | 38  | 25  |
| P2 - Days 1+2 | 11  | 41  | 34  | 38  | 31  | 21  | 62  | 21  | 25  | 28  | 53  | 18  |
| P4 - Days 1+2 | 45  | 72  | 62  | 48  | 44  | 20  | 37  | 65  | 39  | 36  | 28  | 24  |
| P6 - Days 1+2 | 26  | 35  | 48  | 50  | 33  | 15  | 43  | 58  | 38  | 43  | 28  | 13  |
| P7 - D1+2     | 22  | 23  | 59  | 18  | 42  | 15  | 43  | 59  | 44  | 17  | 44  | 19  |
| P9 - Days 1+2 | 98  | 46  | 52  | 68  | 15  | 16  | 78  | 81  | 43  | 49  | 95  | 37  |
| 2-Day Mean    | 40  | 41  | 52  | 45  | 32  | 17  | 49  | 67  | 40  | 34  | 48  | 23  |
| 2-Day/1-Day   | 1.4 | 1.1 | 1.1 | 1.2 | 1.1 | 0.9 | 1.2 | 1.9 | 1.1 | 1.2 | 1.5 | 1.2 |

CV values marked green are >25% and ≤50%; yellow CVs are >50% and ≤100%; red CVs are >100%.



**Table S8.** Z-scores for the first void samples collected from participants P1 to P10 on one or two days

| z-score      | Na  | Mg  | K    | Ca  | Co  | Cu  | Zn  | As  | Rb  | Sr  | Mo  | Pb  |
|--------------|-----|-----|------|-----|-----|-----|-----|-----|-----|-----|-----|-----|
| P1 - Day 1   | 0.9 | 1.0 | 1.2  | 0.4 | 1.2 | 0.8 | 1.4 | 0.3 | 1.1 | 0.3 | 0.4 | 0.3 |
| P1 - Day 2   | 0.3 | 1.0 | 0.7  | 0.4 | 0.9 | 0.2 | 0.2 | 1.4 | 0.7 | 0.7 | 1.5 | 0.6 |
| P2 - Day 1   | 0.7 | 0.5 | 1.1  | 0.8 | 0.9 | 1.1 | 1.0 | 1.1 | 1.1 | 1.0 | 0.9 | 1.1 |
| P2 - Day 2   | 1.0 | 1.1 | 1.1  | 1.0 | 1.2 | 1.2 | 1.1 | 1.1 | 1.2 | 1.1 | 1.1 | 1.1 |
| P3           | 1.0 | 0.7 | 0.3  | 1.1 | 1.2 | 0.1 | 0.7 | 0.4 | 0.1 | 0.9 | 1.1 | 0.5 |
| P4 - Day 1   | 1.1 | 1.2 | 0.8  | 0.7 | 1.2 | 0.6 | 0.9 | 0.6 | 0.6 | 1.0 | 0.3 | 1.5 |
| P4 - Day 2   | 0.3 | 0.0 | 0.6  | 0.4 | 0.4 | 0.5 | 0.0 | 0.9 | 0.6 | 0.3 | 0.2 | 0.4 |
| P5           | 2.6 | 0.5 | 11.1 | 0.3 | 0.0 | 0.0 | 0.7 | 0.0 | 9.1 | 0.7 | 0.4 | 0.0 |
| P6 - Day 1   | 0.0 | 1.5 | 1.2  | 1.5 | 1.1 | 1.1 | 1.5 | 1.4 | 1.3 | 1.5 | 1.5 | 1.0 |
| P6 - Day 2   | 0.6 | 0.8 | 0.9  | 0.6 | 1.4 | 1.1 | 0.6 | 1.4 | 0.7 | 0.5 | 0.3 | 0.3 |
| P7 - Day 1   | 0.9 | 0.4 | 0.9  | 0.5 | 0.7 | 0.6 | 0.0 | 1.2 | 0.8 | 0.5 | 0.2 | 1.4 |
| P7 - Day 2   | 1.9 | 0.7 | 1.5  | 1.7 | 1.5 | 1.3 | 4.8 | 2.1 | 1.0 | 0.3 | 1.5 | 2.7 |
| P8           | 0.1 | 0.5 | 2.0  | 1.1 | 0.4 | 2.1 | 0.4 | 0.5 | 2.3 | 2.1 | 2.2 | 0.5 |
| P9 - Day 1   | 0.8 | 1.1 | 0.4  | 0.9 | 0.3 | 0.7 | 0.3 | 0.0 | 0.0 | 1.0 | 1.5 | 0.2 |
| P9 - Day 2   | 1.0 | 0.5 | 0.8  | 0.8 | 0.7 | 0.4 | 0.9 | 0.9 | 0.7 | 0.9 | 0.1 | 1.1 |
| P10          | 1.4 | 1.7 | 1.1  | 1.3 | 0.6 | 0.3 | 0.8 | 1.5 | 1.0 | 1.6 | 0.3 | 0.3 |
| Mean z-score | 0.9 | 0.8 | 1.6  | 0.8 | 0.9 | 0.8 | 1.0 | 0.9 | 1.4 | 0.9 | 0.8 | 0.8 |

White: Z-score  $\leq 0.5$ , green: z-score = 0.6-1.0, yellow: z-score = 1.1-2.0, red: z-score  $>2$ .

**Table S9a.** Mean urinary element concentrations of participant groups that differ in their smoking status.

| <b>Smoking status</b> | <b>n</b>  | <b>Na</b><br>µg/ml | <b>Mg</b><br>µg/ml | <b>K</b><br>µg/ml | <b>Ca</b><br>µg/ml | <b>Co</b><br>ng/ml | <b>Cu</b><br>ng/ml | <b>Zn</b><br>ng/ml | <b>As</b><br>ng/ml | <b>Rb</b><br>ng/ml | <b>Sr</b><br>ng/ml | <b>Mo</b><br>ng/ml | <b>Pb</b><br>ng/ml |
|-----------------------|-----------|--------------------|--------------------|-------------------|--------------------|--------------------|--------------------|--------------------|--------------------|--------------------|--------------------|--------------------|--------------------|
| Current               | 1         | 5318               | 161                | 6489              | 132                | 1.83               | 12.6               | 96                 | 3.5                | 2821               | 229                | 95                 | 0.96               |
| Occasional            | 1         | 5535               | 112                | 5132              | 139                | 0.42               | 10.1               | 202                | 42.8               | 2052               | 183                | 65                 | 0.97               |
| Past                  | 2         | 2830               | 104                | 3694.5            | 117                | 0.85               | 9.7                | 217                | 13.9               | 1963               | 145                | 33                 | 0.61               |
| Never                 | 6         | 3378               | 98                 | 3759              | 166                | 0.30               | 12.5               | 439                | 60.9               | 1732               | 159                | 55                 | 0.65               |
| <b>Mean</b>           | <b>10</b> | <b>3678</b>        | <b>107</b>         | <b>4156</b>       | <b>150</b>         | <b>0.57</b>        | <b>11.7</b>        | <b>337</b>         | <b>43.9</b>        | <b>1919</b>        | <b>165</b>         | <b>56</b>          | <b>0.70</b>        |

The mean group values are calculated from the mean values of n individuals in the respective group. n = number of participants.

**Table S9b.** Mean urinary element concentrations of participant groups that differ in their alcohol intake.

| <b>Alcohol intake</b> | <b>n</b>  | <b>Na</b><br>µg/ml | <b>Mg</b><br>µg/ml | <b>K</b><br>µg/ml | <b>Ca</b><br>µg/ml | <b>Co</b><br>ng/ml | <b>Cu</b><br>ng/ml | <b>Zn</b><br>ng/ml | <b>As</b><br>ng/ml | <b>Rb</b><br>ng/ml | <b>Sr</b><br>ng/ml | <b>Mo</b><br>ng/ml | <b>Pb</b><br>ng/ml |
|-----------------------|-----------|--------------------|--------------------|-------------------|--------------------|--------------------|--------------------|--------------------|--------------------|--------------------|--------------------|--------------------|--------------------|
| ≥3 u/d                | 2         | 4839.5             | 123                | 5561              | 160                | 0.32               | 11.9               | 308                | 25.2               | 2154               | 211                | 64.5               | 0.87               |
| 1-2 u/d               | 2         | 2211.5             | 86.6               | 3201              | 67.0               | 0.87               | 12.6               | 409                | 15.7               | 1724               | 101                | 36.5               | 0.58               |
| < 1 u/d               | 6         | 3780               | 108.4              | 4006              | 174                | 0.6                | 11.3               | 322                | 59.6               | 1906               | 172                | 59                 | 0.69               |
| <b>Mean</b>           | <b>10</b> | <b>3678</b>        | <b>107</b>         | <b>4156</b>       | <b>149.8</b>       | <b>0.57</b>        | <b>11.7</b>        | <b>337</b>         | <b>43.9</b>        | <b>1919</b>        | <b>165</b>         | <b>55.7</b>        | <b>0.70</b>        |

The mean group values are calculated from the mean values of n individuals in the respective group. n = number of participants, u/d = units\*/day

\*Units denote UK Alcohol units

**Table S9c.** Mean urinary element concentrations of participant groups that differ in their caffeine intake.

| <b>Caffeine intake</b> | <b>n</b>  | <b>Na</b><br>µg/ml | <b>Mg</b><br>µg/ml | <b>K</b><br>µg/ml | <b>Ca</b><br>µg/ml | <b>Co</b><br>ng/ml | <b>Cu</b><br>ng/ml | <b>Zn</b><br>ng/ml | <b>As</b><br>ng/ml | <b>Rb</b><br>ng/ml | <b>Sr</b><br>ng/ml | <b>Mo</b><br>ng/ml | <b>Pb</b><br>ng/ml |
|------------------------|-----------|--------------------|--------------------|-------------------|--------------------|--------------------|--------------------|--------------------|--------------------|--------------------|--------------------|--------------------|--------------------|
| 3+ d/d                 | 5         | 3810               | 98.7               | 3809              | 118                | 0.80               | 12.3               | 382                | 24.2               | 1971               | 143                | 52.2               | 0.70               |
| 1-2 d/d                | 3         | 3715               | 121                | 4880              | 178                | 0.35               | 11.3               | 311                | 78.9               | 1886               | 194                | 57.0               | 0.82               |
| Rarely                 | 2         | 3293               | 106                | 3938              | 188                | 0.34               | 10.7               | 260                | 40.7               | 1836               | 178                | 62.5               | 0.53               |
| <b>Mean</b>            | <b>10</b> | <b>3678</b>        | <b>107</b>         | <b>4156</b>       | <b>150</b>         | <b>0.57</b>        | <b>11.7</b>        | <b>337</b>         | <b>43.9</b>        | <b>1919</b>        | <b>165</b>         | <b>55.7</b>        | <b>0.70</b>        |

The mean group values are calculated from the mean values of n individuals in the respective group. n = number of participants, d/d = drinks\*/day

\*Caffeine drinks include coffee, tea and caffeinated soft drinks.

**Table S10.** Data to evaluate possible relationships of urinary element concentrations with gender.

|               | <b>Gender</b> | <b>Na</b><br>µg/ml | <b>Mg</b><br>µg/ml | <b>K</b><br>µg/ml | <b>Ca</b><br>µg/ml | <b>Co</b><br>ng/ml | <b>Cu</b><br>ng/ml | <b>Zn</b><br>ng/ml | <b>As</b><br>ng/ml | <b>Rb</b><br>ng/ml | <b>Sr</b><br>ng/ml | <b>Mo</b><br>ng/ml | <b>Pb</b><br>ng/ml |
|---------------|---------------|--------------------|--------------------|-------------------|--------------------|--------------------|--------------------|--------------------|--------------------|--------------------|--------------------|--------------------|--------------------|
| Mean          | female        | 3606               | 114                | 4539              | 141                | 0.76               | 10.7               | 259                | 64.6               | 2088               | 147                | 56.9               | 0.72               |
| Median        | female        | 3357               | 111                | 4270              | 158                | 0.44               | 10.4               | 221                | 36.4               | 2072               | 152                | 46.5               | 0.68               |
| SD            | female        | 1469               | 28                 | 1031              | 77                 | 0.63               | 1.4                | 158                | 65.7               | 383                | 59                 | 29.3               | 0.22               |
| CV (%)        | female        | 41                 | 25                 | 23                | 55                 | 83                 | 14                 | 61                 | 102                | 18                 | 40                 | 52                 | 30                 |
| Male          | male          | 3512               | 85                 | 3255              | 157                | 0.18               | 12.5               | 458                | 7.3                | 1616               | 181                | 47.8               | 0.61               |
| Median        | male          | 3540               | 88                 | 2915              | 162                | 0.18               | 14.1               | 383                | 5.6                | 1603               | 184                | 52.4               | 0.60               |
| SD            | male          | 1677               | 33                 | 1562              | 57                 | 0.05               | 3.0                | 264                | 5.2                | 492                | 61                 | 27.4               | 0.09               |
| CV (%)        | male          | 48                 | 39                 | 48                | 36                 | 27                 | 24                 | 58                 | 71                 | 30                 | 34                 | 57                 | 15                 |
| Mean/Mean     | male/fem      | 1.0                | 0.7                | 0.7               | 1.1                | 0.2                | 1.2                | 1.8                | 0.1                | 0.8                | 1.2                | 0.8                | 0.8                |
| Median/Median | male/fem      | 1.1                | 0.8                | 0.7               | 1.0                | 0.4                | 1.4                | 1.7                | 0.2                | 0.8                | 1.2                | 1.1                | 0.9                |
| P             | male vs. fem  | 0.91               | 0.09               | 0.07              | 0.67               | 0.04               | 0.11               | 0.08               | 0.05               | 0.05               | 0.29               | 0.55               | 0.26               |

Results that may be indicative of significant differences between genders are highlighted in red.

**Table S11:** Data to evaluate possible relationships of urinary element concentrations with diet groups.

|                   | Diet group | Na<br>µg/ml | Mg<br>µg/ml | K<br>µg/ml | Ca<br>µg/ml | Co<br>ng/ml | Cu<br>ng/ml | Zn<br>ng/ml | As<br>ng/ml | Rb<br>ng/ml | Sr<br>ng/ml | Mo<br>ng/ml | Pb<br>ng/ml |
|-------------------|------------|-------------|-------------|------------|-------------|-------------|-------------|-------------|-------------|-------------|-------------|-------------|-------------|
| Mean              | omv        | 3372        | 88.4        | 3370       | 169         | 0.26        | 11.62       | 427         | 40.3        | 1737        | 161         | 51.3        | 0.59        |
| Median            | omv        | 3387        | 85.7        | 3310       | 163         | 0.19        | 11.28       | 352         | 10.8        | 1888        | 157         | 40.5        | 0.55        |
| SD                | omv        | 1344        | 30.4        | 1180       | 54          | 0.17        | 2.74        | 241         | 57.6        | 445         | 49          | 32.0        | 0.13        |
| CV (%)            | omv        | 40          | 34          | 35         | 32          | 67          | 24          | 56          | 143         | 26          | 30          | 62          | 22          |
| Mean              | no-m       | 4400        | 127.4       | 5252       | 161         | 0.66        | 11.30       | 246         | 56.6        | 2107        | 199         | 66.2        | 0.88        |
| Median            | no-m       | 5318        | 134.5       | 5489       | 180         | 0.41        | 11.13       | 233         | 36.5        | 2181        | 217         | 64.3        | 0.85        |
| SD                | no-m       | 1742        | 29.4        | 1158       | 46          | 0.66        | 1.88        | 124         | 75.1        | 534         | 42          | 21.2        | 0.15        |
| CV (%)            | no-m       | 40          | 23          | 22         | 28          | 101         | 17          | 50          | 133         | 25          | 21          | 32          | 17          |
| Mean/Mean-omv     | no-m       | 1.3         | 1.4         | 1.6        | 1.0         | 2.5         | 1.0         | 0.6         | 1.4         | 1.2         | 1.2         | 1.3         | 1.5         |
| Median/Median-omv | no-m       | 1.6         | 1.6         | 1.7        | 1.1         | 2.2         | 1.0         | 0.7         | 3.4         | 1.2         | 1.4         | 1.6         | 1.6         |
| P (vs. omv)       | no-m       | 0.24        | 0.04        | 0.01       | 0.79        | 0.10        | 0.82        | 0.15        | 0.66        | 0.19        | 0.17        | 0.37        | 0.003       |
| Mean              | no-d       | 3369        | 127.3       | 4941       | 55          | 1.65        | 11.14       | 122         | 15.8        | 2409        | 115         | 52.7        | 0.72        |
| Median            | no-d       | 2820        | 111.0       | 4323       | 21          | 1.66        | 10.51       | 131         | 11.4        | 2235        | 70          | 33.0        | 0.62        |
| SD                | no-d       | 1740        | 29.3        | 1350       | 67          | 0.19        | 1.23        | 22          | 15.0        | 358         | 99          | 36.7        | 0.21        |
| CV (%)            | no-d       | 52          | 23          | 27         | 121         | 11          | 11          | 18          | 95          | 15          | 86          | 70          | 29          |
| Mean/Mean-omv     | no-d       | 1.0         | 1.4         | 1.5        | 0.3         | 6.4         | 1.0         | 0.3         | 0.4         | 1.4         | 0.7         | 1.0         | 1.2         |
| Median/Median-omv | no-d       | 0.8         | 1.3         | 1.3        | 0.1         | 8.8         | 0.9         | 0.4         | 1.1         | 1.2         | 0.4         | 0.8         | 1.1         |
| P (vs. omv)       | no-d       | 1.00        | 0.08        | 0.08       | 0.01        | 3.1E-07     | 0.78        | 0.06        | 0.50        | 0.04        | 0.30        | 0.95        | 0.20        |

Results that may be indicative of significant differences between diet groups are highlighted in red.

omv = omnivore, no-m = no meat, no-d = no dairy.

## References

1. USDA Food Composition Databases, Nutrient Lists, United States Department of Agriculture (ndb.nal.gov).
2. Enig, M. G., 2010, Mineral Nutrients. In *Kirk-Othmer Encyclopedia of Chemical Technology*.
3. NHS, Vitamins and minerals, (nhs.uk/conditions/vitamins-and-minerals/others).
4. Cabrera, C., Lloris, F., et al. 2003, Mineral content in legumes and nuts: contribution to the Spanish dietary intake. *Sci. Total Environ.* **308**, 1-14.
5. World Health Organisation (ww.who.int).
6. European Food Safety Authority, 2014. Dietary exposure to inorganic arsenic in the European population, *EFSA Journal*, **12**, 3597.
7. Anke, M., Angelow, L., 1995, Rubidium in the food chain, *Fresenius' J. Anal. Chem.* **352**, 236-239.
8. Schroeder, H. A., Tipon, I. H., Nason, A. P., 1972. Trace metals in man: Strontium and barium, *J. Chron. Dis.* **25**, 491-517.
9. European Food Safety Authority, 2012. Lead dietary exposure in the European population, *EFSA J.* **10**, 2831.
10. Guérin, T, Le Calvez et al. 2017, Levels of lead in foods from the first French total diet study on infants and toddlers. *Food Chem.* **237**, 849-856.
11. Seronorm, Seronorm™ Trace Elements Urine L-1, Lot 1403080, 2015.
12. J. Snell and J. Charoud-Got. Certification Report. The Certification of the Mass Fractions of Elements in Bovine Muscle Certified Reference Material ERM®-BB184, *EUR 25481 EN – 2012*, European Union, 2012.
13. Institute for Reference Materials and Measurements (IRMM), *Certified Reference Material BCR-639*, 2007, [https://ec.europa.eu/jrc/sites/default/files/rm/BCR-639\\_cert.pdf](https://ec.europa.eu/jrc/sites/default/files/rm/BCR-639_cert.pdf)
14. R. E. T. Moore, F. Larner, B. J. Coles and M. Rehkämper. High precision zinc stable isotope measurement of certified biological reference materials using the Double Spike Technique and Multiple Collector-ICP-MS, *Anal. Bioanal. Chem.*, 2017, **409**, 2941-2950.
