# Supplementary material for: Determination of major and trace element variability in healthy human urine by ICP-QMS and specific gravity normalisation
Source: RSC Adv. 2018 Nov 13;8(66):38022–35. doi: 10.1039/c8ra06794e (PMC9089848; doi:10.1039/c8ra06794e)
Supplement: RA-008-C8RA06794E-s002 [file RA-008-C8RA06794E-s002.xlsx]

## Sheet: Table S5
Supplementary Information (Part II) to:
Determination of major and trace element variability in healthy human urine by ICP-QMS and specific gravity normalisation
By Moore RET · Rehkӓmper M · Kreissig K · Strekopytov S · Larner F
Specific gravity-normalised urine concentrations for all samples from each participant.
	Na	Mg	K	Ca	Co	Cu	Zn	As	Rb	Sr	Mo	Pb
	mg/ml	µg/ml	mg/ml	µg/ml	ng/ml	ng/ml	ng/ml	ng/ml	µg/ml	ng/ml	ng/ml	ng/ml
P1 Day 1	4.75	126	2.22	181	0.3	10.7	657	10.2	1.46	149	25.3	0.56
	2.72	92	6.11	150	0.2	11	484	10.4	3.51	129	51.6	0.7
	4.59	119	4.89	264	0.17	7.1	397	8.6	2.47	190	27	0.56
	3.62	109	3.64	207	<0.08	8	395	14.1	2.16	160	20.7	0.53
P1 Day 2	3.19	119	1.52	301	0.21	9.5	604	271.2	0.92	256	16.5	0.96
	3.07	45	6.49	91	0.17	9.6	517	156.5	3.88	101	24.8	0.72
	0.71	79	2.68	167	0.19	10.2	808	118	1.96	163	27.4	0.82
	4.16	100	1.68	400	0.1	7.7	377	71.1	0.79	267	25.4	1.01
P2 Day 1	5.15	137	2.65	73	0.57	13	340	55	1.4	105	118.2	0.99
	5.23	134	5.09	86	0.37	10	238	47.1	2.01	147	85.8	1.15
	5.75	152	6.58	133	0.49	10.4	121	45.2	2.36	192	31	1.17
P2 Day 2	4.85	25	3.41	205	0.52	11.7	349	44.8	1.47	251	75.3	1.01
	5.63	119	6.74	182	0.28	7.8	96	35.1	2.55	212	46.5	0.75
	6.6	105	6.31	152	0.27	7.7	66	29.4	2.53	189	31.8	0.78
P3 Day 1	1.27	99	2.68	122	0.66	9.6	235	118.2	1.26	121	57.4	0.86
	1.23	84	2.71	122	0.49	16.7	286	69.2	1.32	115	52.5	0.86
	1.61	127	8.43	262	<0.08	7.2	187	58.4	2.56	164	20.6	<0.03
	1.69	147	1.49	281	<0.08	9.3	509	169.6	0.64	197	38	<0.03
	1.54	129	2.29	280	0.51	7.4	373	517.3	0.97	201	40.4	0.99
P4 Day 1	1.41	176	2.97	132	0.57	12.6	290	138	1.71	139	88.9	0.54
	2.78	118	4.33	126	0.41	13.6	253	150	2.34	129	93.2	0.4
	4.47	6	4.49	159	<0.08	9.4	145	97.2	1.5	118	95.4	<0.03
	6.13	2	10.23	191	0.36	9.4	245	113.7	2.34	94	84	0.37
P4 Day 2	3.36	146	2.36	125	0.75	14.8	204	41.7	1.29	110	87.7	0.55
	4.64	115	5.19	111	0.51	15	236	38.4	2.23	92	73.6	0.47
	2.89	76	8.06	113	0.4	9.1	44	27	3.45	98	48	0.41
	1.86	124	3	116	0.88	13.5	249	34.9	1.89	101	124.7	0.37
	2.33	267	1.25	351	0.82	14.6	312	39.8	0.8	236	136.2	0.7
P5 Day 1	4.4	134	3.74	42	1.71	9.7	91	6.2	1.63	91	114.5	0.74
	4.28	170	4.5	66	1.63	10.9	73	7.7	2.21	135	106	0.78
	8.93	323	13.18	282	2.24	19.7	101	<0.5	5.47	418	79.1	<0.03
	3.66	18	4.53	139	1.74	10	125	10.3	1.97	273	80.6	1.07
P6 Day 1	1.96	189	1.26	27	1.93	11	215	44.7	0.91	87	40.1	0.63
	2.51	87	6.74	10	0.89	10.2	103	31.2	3.11	37	31.6	0.54
	1.79	90	5.99	9	1.36	10.6	94	29.1	3	34	29	0.61
	1.62	79	3.3	7	1.65	9.6	111	24.8	1.92	27	31.4	0.59
P6 Day 2	2.54	132	2.46	17	2.55	13.1	177	14.5	1.65	61	26.9	0.58
	3.37	111	2.95	28	1.67	11.7	209	11.6	1.59	90	28.7	0.77
	3.09	72	6.37	14	1.16	8.7	66	9.8	3.24	50	17.5	0.5
	2.28	124	4.26	24	1.28	8.6	97	9.9	2.2	81	47.2	0.61
P7 Day 1	2.49	110	1.4	185	0.13	8.5	359	10.7	1.06	215	20.7	0.47
	3.21	100	4.27	228	<0.08	8.9	585	7.3	2.03	199	36.1	0.57
	2.73	127	2.39	251	0.12	7.6	262	9.4	1.31	227	27.2	0.54
	4.02	66	2.02	162	0.12	6.3	202	7.7	1.22	186	8.1	0.54
P7 Day 2	2.65	97	1.55	180	0.17	10.6	438	3.9	1.23	227	22.8	0.53
	4.14	81	4.92	251	<0.08	9.6	306	<0.5	2.16	238	41.6	0.85
	4.34	72	7.25	212	<0.08	10.1	160	3.4	3.49	219	35.1	0.62
	3.01	132	2.94	285	<0.08	10	279	4.9	1.64	324	52.5	0.66
	2.81	101	2.26	200	0.17	8.5	246	3.7	1.36	248	50.6	0.6
P8 Day 1	4.28	65	1.85	98	0.24	12.8	580	3.7	1.23	104	48.6	0.51
	4.52	70	2.71	109	0.18	15.4	653	3.8	1.69	121	95.4	0.58
	7.02	54	2.75	117	<0.08	15	338	3.9	1.52	103	67.6	0.86
	8.02	53	2.68	93	0.43	15.4	301	3.6	1.34	108	53.8	0.68
P9 Day 1	0.41	65	1.6	76	0.18	16	1498	4.3	1.03	112	15.3	0.73
	0.66	93	1.52	164	0.18	18	1329	4.4	1.03	203	10.8	0.67
	0.92	107	1.46	276	0.18	13.8	788	4	0.82	265	9.8	0.65
	1.13	54	1.15	54	<0.08	11.3	274	2.4	0.54	67	8.7	<0.03
P9 Day 2	1.56	49	2.51	58	0.18	15.2	376	21.5	1.56	89	82.9	0.42
	5.76	50	4.44	120	<0.08	16.1	317	17.9	2.1	154	61.8	0.62
	3.76	21	2.98	74	0.2	12.2	198	11.3	1.62	111	99.5	0.55
P10 Day 1	3.66	170	3.95	233	0.24	14.2	500	10.1	1.57	306	55.5	0.72
	4.09	116	7.56	160	0.21	12.5	322	6.5	2.76	200	40.1	0.69
	4.35	122	8.04	164	0.23	13.6	327	7.1	3.19	230	45.6	0.73
	4.02	132	4.43	136	0.25	12.1	353	8.2	1.88	211	71.3	0.67
	4.61	132	5.97	214	<0.08	16.2	566	5.5	1.88	251	109.1	0.97
